# Supplementary material
Source: PubMed Central journal article supplement (PMC6439590)
Supplement: jama-321-553-s003.pdf [file jama-321-553-s003.pdf]

SPRINT MIND Investigators for the SPRINT Research Group. Effect of intensive vs standard blood pressure control on probable dementia: a randomized clinical trial [published online January 17, 2019]. doi:10.1001/jama.2018.21442

## Data Sharing Statement

### Data

**Data available:** Yes

**Data types:** Deidentified participant data, Data dictionary

**How to access data:** Data will be available in BioLINCC:

<https://biolincc.nhlbi.nih.gov/studies/sprint>

**When available:** beginning date: 07-01-2020

### Supporting Documents

**Document types:** None

### Additional Information

**Who can access the data:** Data will be available for investigators providing an IRB/Ethics approval or certification of exemption from IRB/Ethics review, and also agreeing to the terms and conditions of a data use agreement

**Types of analyses:** Data will be available for any purpose, unless prohibited by the informed consent.

**Mechanisms of data availability:** Data will be available for investigators providing an IRB/Ethics approval or certification of exemption from IRB/Ethics review, and also agreeing to the terms and conditions of a data use agreement.
